# Supplementary material for: CT Fractional Flow Reserve for the Diagnosis of Myocardial Bridging-Related Ischemia: A Study Using Dynamic CT Myocardial Perfusion Imaging as a Reference Standard
Source: PubMed Central journal article supplement — Korean J Radiol. 2021 Sep 24;22(12):1964–73. doi: 10.3348/kjr.2021.0043 (PMC8628161; doi:10.3348/kjr.2021.0043), 2021-09-24
Supplement: kjr-22-1964-s002.pdf [file kjr-22-1964-s002.pdf]

**Supplementary Table 1. Intra-Observer Reproducibility of All Parameters**

|                                      | ICC (95% CI)        | <i>P</i> |
|--------------------------------------|---------------------|----------|
| Myocardial bridging length           | 0.996 (0.993–0.997) | < 0.001  |
| Myocardial bridging depth            | 0.998 (0.997–0.999) | < 0.001  |
| CT-FFR <sub>systolic</sub>           | 0.988 (0.981–0.992) | < 0.001  |
| CT-FFR <sub>diastolic</sub>          | 0.993 (0.990–0.996) | < 0.001  |
| $\Delta$ CT-FFR <sub>systolic</sub>  | 0.969 (0.951–0.980) | < 0.001  |
| $\Delta$ CT-FFR <sub>diastolic</sub> | 0.981 (0.969–0.988) | < 0.001  |

CI = confidence interval, FFR = fractional flow reserve, ICC = intraclass correlation coefficient
